# Supplementary material for: Legal and ethical framework for global health information and biospecimen exchange - an international perspective
Source: BMC Med Ethics. 2020 Jan 21;21:8. doi: 10.1186/s12910-020-0448-9 (PMC6975025; doi:10.1186/s12910-020-0448-9)
Supplement: Supplementary file 1 — Additional file 1. List of definitions: the Excel file “List of definitions_data protection.xlsx” includes legal definitions for the terms “personal data”, “anonymized”, “de-identified”, “pseudonymized” and “encrypted”, as provided by the participating ICN countries/regions. [file 12910_2020_448_MOESM1_ESM.xlsx]

## Sheet: Tabelle1
Country
	Personal (health) data	Anonymized	De-identified	Pseudonymized (coded)	Encrypted
AUT	Personal data’ means any information relating to an identified or identifiable natural person (‘data subject’); an identifiable natural person is one who can be identified, directly or indirectly, in particular by reference to an identifier such as a name, an identification number, location data, an online identifier or to one or more factors specific to the physical, physiological, genetic, ment…	Information which does not relate to an identified or identifiable natural person or to personal data rendered anonymous in such a manner that the data subject is not or no longer identifiable (GDPR 2018, Recital 26)	-	Pseudonymisation means the processing of personal data in such a manner that the personal data can no longer be attributed to a specific data subject without the use of additional information, provided that such additional information is kept separately and is subject to technical and organisational measures to ensure that the personal data are not attributed to an identified or identifiable natu…	This notion is not defined in applicable laws. However, encryption may be an appropriate safeguard for the processing of personal data in some cases (inter alia Article 6.4 in GDPR).
CHE	Personal data (data): all information relating to an identified or identifiable person (FADP, Art 3a) Health-related personal data means information concerning the health or disease of a specific or identifiable person, including genetic data (HRA, Art. 3f)	Anonymised biological material and anonymised health-related data means biological material and health-related data which cannot (without disproportionate effort) be traced to a specific person (HRA, Art. 3i)	-	Coded biological material and coded health-related personal data means biological material and data linked to a specific person via a code (HRA, Art. 3h)	-
CHN	There is no single, pervasive definition, but the concept is used in the various regulations and guidance. Personal information refers to information recorded electronically or in other ways that can identify a specific person or reflect the activities of a specific person, either separately or in combination with other information. Personal data: Identity card, certificate of officers, passport,…	Technology is used to the personal information to make the subject unrecognized and the processed information cannot be recovered. http://c.gb688.cn/bzgk/gb/showGb?type=online&hcno=4FFAA51D63BA21B9EE40C51DD3CC40BE (Accessed 14.03.2019)	De-identification: through the technical processing of personal information, it is impossible to identify the personal data subject without the help of additional information. De-identification is based on individuals. Pseudonyms, encryption, hash functions or other technical methods are used to replace the identification of personal information (Information Security Technology –Personal informat…	-	-
GBR	Personal data” means any information relating to an identified or identifiable living individual, thatis a living individual who can be identified, directly or indirectly, in particular by reference to— (a) an identifier such as a name, an identification number, location data or an online identifier, or (b) one or more factors specific to the physical, physiological, genetic, mental, economic, cu…	Anonymisation is the process of turning data into a form which does not identify individuals and where identification is not likely to take place (Information Commissioner: https://ico.org.uk)	-	Pseudonymisation means the processing of personal data in such a manner that the personal data can no longer be attributed to a specific data subject without the use of additional information, provided that such additional information is kept separately and is subject to technical and organisational measures to ensure that the personal data are not attributed to an identified or identifiable natu…	Encrypted data are data for which measure that render personal data unintelligible to any person not authorised.to access the data have been applied (Data Protection Act 2018, Part3, Chapter 4, Principle 68)
HKG	Any data (a) relating directly or indirectly to a living individual; (b) from which it is practicable for the identity of the individual to be directly or indirectly ascertained; and (c) in a form in which access to or processing of the data is practicable (Personal Data (Privacy) Ordinance (CAP 486 of the laws of Hong Kong))	-	-	-	-
JPN	"Personal information" in this Act means that information relating to a living individual which falls under any of each following item: (i) those containing a name, date of birth, or other descriptions etc. (meaning any and all matters (excluding an individual identification code) stated, recorded or otherwise expressed using voice, movement or other methods in a document, drawing or electromagne…	The Japanese Act on Protection of Personal Information (APPI,) distinguishes three categories of information, “personal information”, “anonymously processed information” and “non-personal information”. If personal information is de-identified and hence does not meet the definition of personal information, it is considered as non-personal information. Such non-personal information may be considere…	-	See column "anonimyzed"	-
ITA	Personal data’ means any information relating to an identified or identifiable natural person (‘data subject’); an identifiable natural person is one who can be identified, directly or indirectly, in particular by reference to an identifier such as a name, an identification number, location data, an online identifier or to one or more factors specific to the physical, physiological, genetic, ment…	Information which does not relate to an identified or identifiable natural person or to personal data rendered anonymous in such a manner that the data subject is not or no longer identifiable (GDPR 2018, Recital 26)	-	Pseudonymisation means the processing of personal data in such a manner that the personal data can no longer be attributed to a specific data subject without the use of additional information, provided that such additional information is kept separately and is subject to technical and organisational measures to ensure that the personal data are not attributed to an identified or identifiable natu…	This notion is not defined in applicable laws. However, encryption may be an appropriate safeguard for the processing of personal data in some cases (inter alia Article 6.4 in GDPR).
SGP	“Personal data” is defined by the PDPA as “data, whether true or not, about an individual who can be identified – a) from that data; or b) from that data and other information to which the organization has or is likely to have access (PDPC Advisory Guideline for the Healthcare Sector)	“Anonymisation” is the process of removing identifying information, such that the remaining data does not identify any particular individual (PDPC Advisory Guidelines on Key Concepts in the Personal Data Protection Act)	-	“Pseudonymisation” is also referred to as coding. Pseudonyms can be irreversible, where the original values are properly disposed and the pseudonymisation was done in a non-repeatable fashion, or reversible (by the owner of the original data), where the original values are securely kept but can be retrieved and linked back to the pseudonym, should the need arises (PDPC Guide to Basic Data Anonymi…	Encryption is to restrict access to the original dataset, limiting access to only authorized users, and/ or controlling access through passwords (PDPC Advisory Guidelines on the Personal Data Protection Act For Selected Topics).
SWE	Personal data’ means any information relating to an identified or identifiable natural person (‘data subject’); an identifiable natural person is one who can be identified, directly or indirectly, in particular by reference to an identifier such as a name, an identification number, location data, an online identifier or to one or more factors specific to the physical, physiological, genetic, ment…	Information which does not relate to an identified or identifiable natural person or to personal data rendered anonymous in such a manner that the data subject is not or no longer identifiable (GDPR 2018, Recital 26)	-	Pseudonymisation means the processing of personal data in such a manner that the personal data can no longer be attributed to a specific data subject without the use of additional information, provided that such additional information is kept separately and is subject to technical and organisational measures to ensure that the personal data are not attributed to an identified or identifiable natu…	This notion is not defined in applicable laws. However, encryption may be an appropriate safeguard for the processing of personal data in some cases (inter alia Article 6.4 in GDPR).
TUR	This is defined as any type of information that relates to an identified or identifiable individual (Data Protection Law No. 6698Law No. 6698 of 2016).	This is defined as rendering personal data impossible to link with an identified or identifiable natural person, even though matching them with other data (Protection of personal data Law No. 6698 of 2016; The Regulation on the Erasure, Destruction or Anonymization of Personal Data, 28 October 2017).	-	-	-
TWN	Personal information: the name, date of birth, I.D. Card number, passport number, characteristics, fingerprints, marital status, family, education, occupation, medical record, medical treatment, genetic information, sexual life, health examination, criminal record, contact information, financial conditions, social activities and other information which may be used to identify a specific person, b…	-	-	Coding: Codes are used to substitute for the participant’s personal information, such as name, ID card number, and medical records number, to protect his/her privacy and identity (Human Biobank Management Act).	Encryption: This term refers to the process of making the participant’s personal data and information irreversibly unidentifiable (Human Biobank Management Act).
UGA	"Personal data" means information about a person from which the person can be identified, that is recorded in any form and includes data that relates to- (a) the nationality, age or marital status of the person; (b) the educational level, or occupation of the person; (c) an identification number, symbo l or other particulars assigned to a person; (d) identity data; or (e) other information which …	-	-	-	-
USA	Personal data is referred to as "Individually identifiable health information" which is protected under HIPAA as "Protected Health Information (PHI). Legally, individually identifiable health information is information that is a subset of health information, including demographic information collected from an individual, and: (1) Is created or received by a health care provider, health plan, empl…	-	De-identification: occurs when data has been stripped of common identifiers and there is no reasonable basis to believe that the information can be used to identify an individual. This is done by the Safe Harbor Method (removal of all 18 types of identifiers) or by Expert Determination (application of statistical and scientific principles) (45 CFR § 164.514)	-	Encryption: method of converting an original message of regular text into encoded text...there would be a low probability that anyone other than the receiving party who has the key to the code or access to another confidential process would be able to decrypt (translate) the text and convert it into plan, comprehensible text (45 CFR § 164.514)
